# Supplementary material
Source: Springer Nature journal article supplement (https://www.springermedizin.de/resource/supplementary/12889_2010_2611_MOESM2_ESM.pdf/9486726)

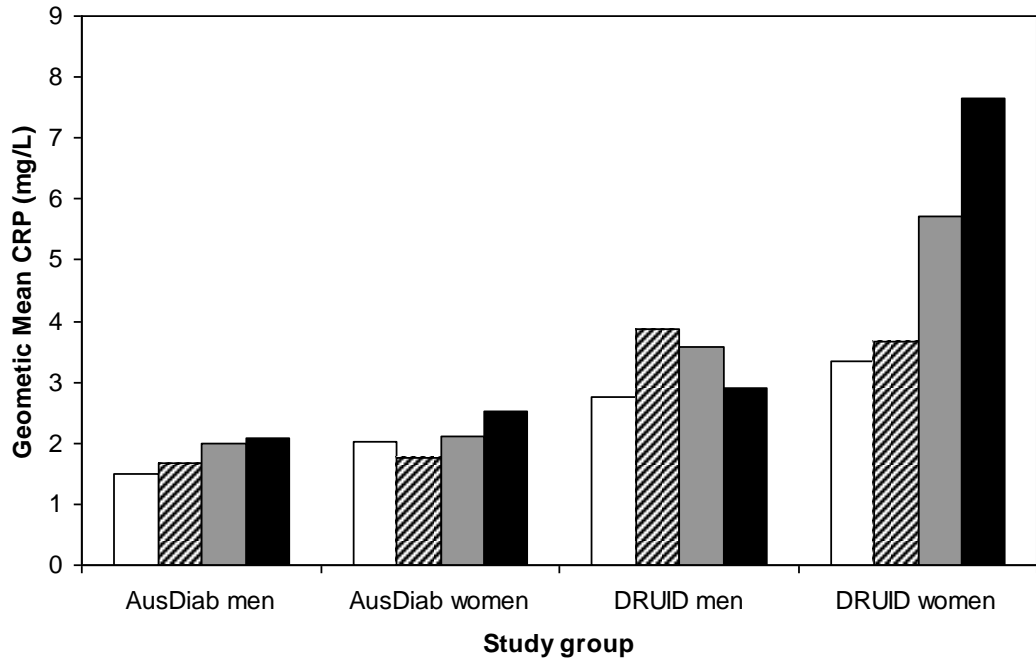

Supplement: MOESM2 [file 9486726]
